# Supplementary material for: A dual responsive targeted drug delivery system based on smart polymer coated mesoporous silica for laryngeal carcinoma treatment
Source: Royal Society of Chemistry journal article supplement (doi:10.1039/c4nj00579a), 2014-07-11
Supplement: c4nj00579a1.pdf [file c4nj00579a1.pdf]

**To New Journal of Chemistry**

**Supplementary Information for**

**Dual responsive targeted drug delivery system based on smart polymer  
coated mesoporous silica for laryngeal carcinoma treatment**

**Xueshibojie Liu <sup>a</sup>, Dan Yu<sup>a</sup>, Chunshun Jin <sup>a\*</sup>, Xiaowei Song <sup>b\*</sup>, Jinzhang Cheng<sup>a</sup>, Xue Zhao<sup>a</sup>, Xinmeng Qi<sup>a</sup>, Guangxin Zhang<sup>c</sup>**

<sup>a</sup>*Department of Otolaryngology Head and Neck Surgery, the Second Hospital, Jilin University, Changchun 130041, China*

<sup>b</sup>*State Key Laboratory of Inorganic Synthesis and Preparative Chemistry, College of Chemistry, Jilin University, Changchun 130012, China*  
*E-mail: xiaoweisong@jlu.edu.cn*

<sup>c</sup>*Department of Thoracic Surgery, the Second Hospital, Jilin University, Changchun 130041, China*

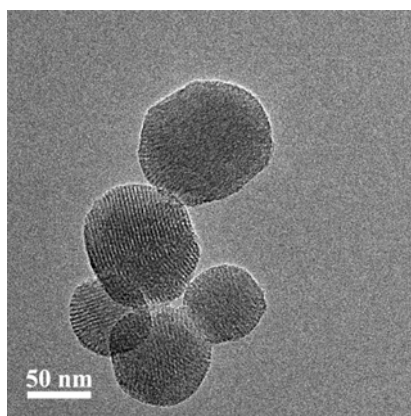

**Fig. S1.** The TEM image of MSNs.

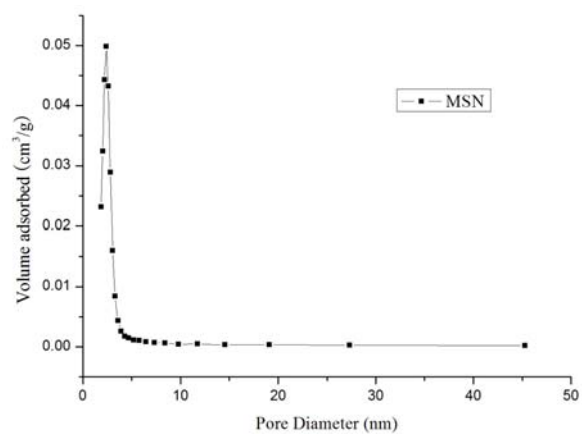

**Fig. S2.** Pore size distribution curve derived from desorption isotherm measurements and Barret–Joyner–Halenda (BJH) analysis indicated an average pore diameter of 2.5 nm.

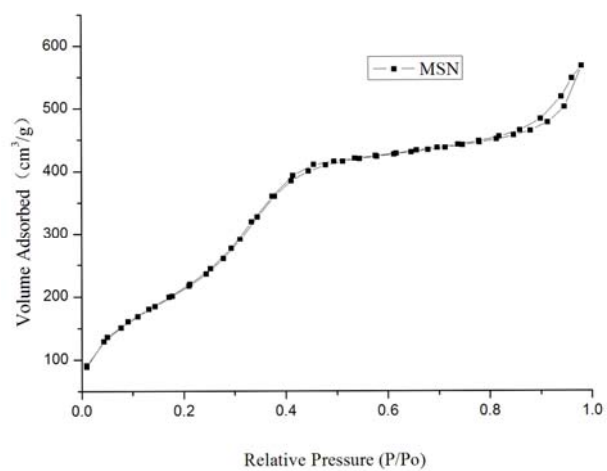

**Fig. S3.** Nitrogen adsorption desorption isotherms and Brunauer–Emmett–Teller (BET) analysis indicated specific surface area of 786 m<sup>2</sup>g<sup>-1</sup>.

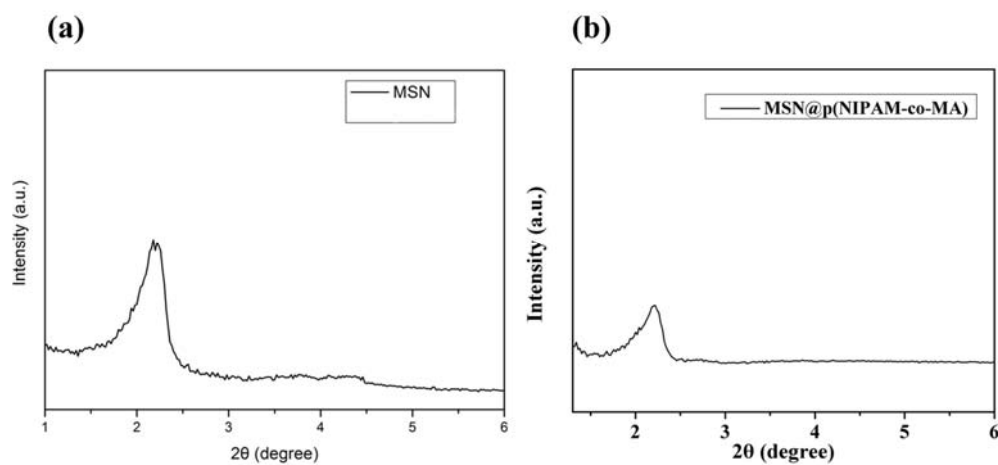

**Fig. S4.** Low-angle XRD pattern revealed that (a) MSNs exhibited a well-ordered porous structure with a hexagonal arrangement, (b) MSN@p(NIPAM-co-MA) still remained mesoporous despite the lower intensity of XRD peaks, which may be ascribed to the capping effect.

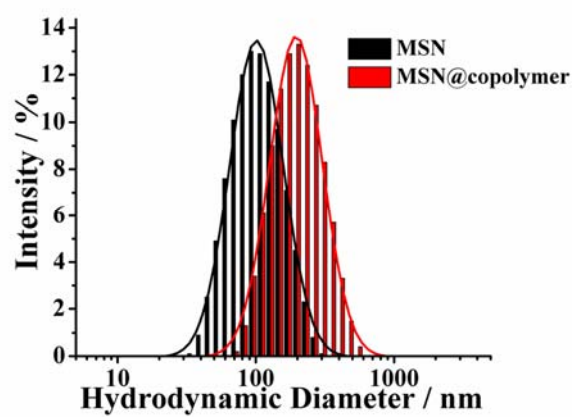

**Fig. S5.** Hydrodynamic diameter of MSN and MSN@p(NIPAM-*co*-MA).

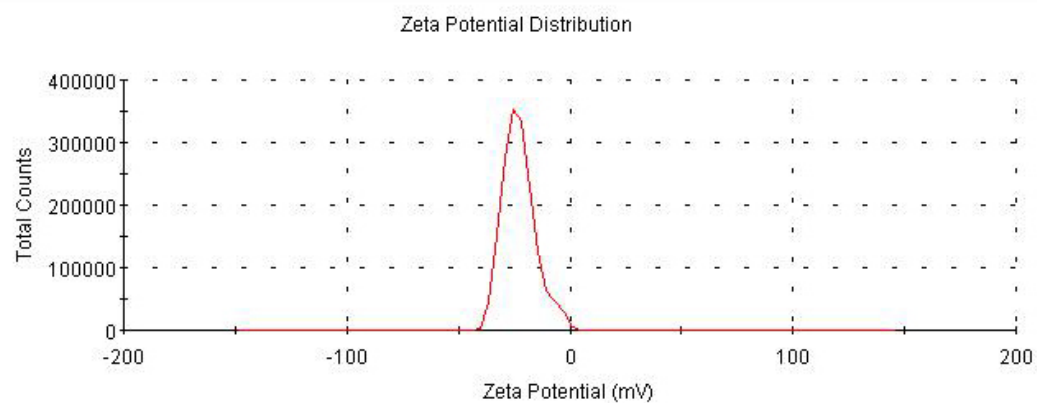

**Fig. S6.** Zeta potential distribution of MSN@p(NIPAM-co-MA) in distilled H<sub>2</sub>O.

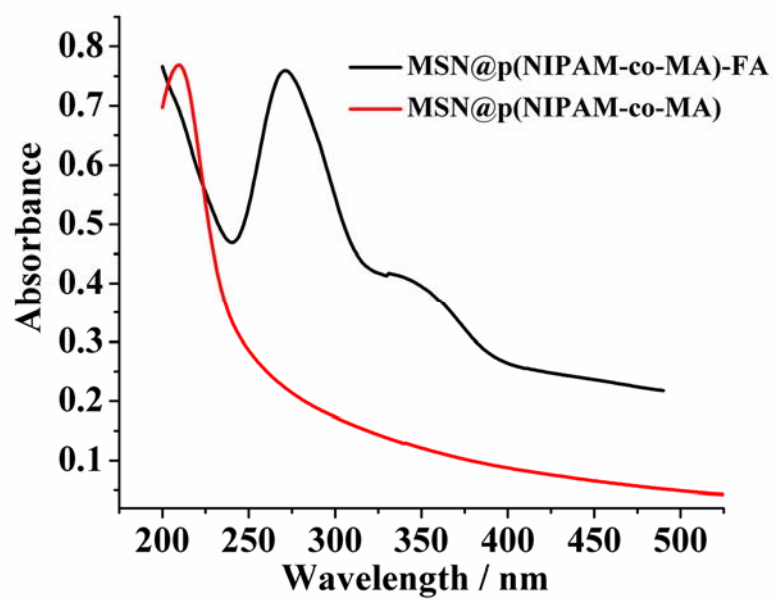

**Fig. S7.** UV-vis absorption spectra of MSN@p(NIPAM-*co*-MA) and MSN@p(NIPAM-*co*-MA)-FA.

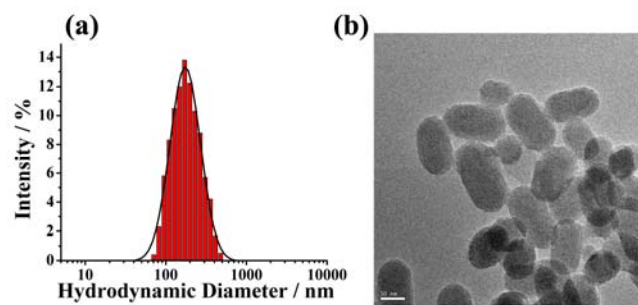

**Fig. S8.** The nanodevices were stable in 10mM PBS. They were well distributed in PBS for one month without significant changes to their size (a) and morphology (b).

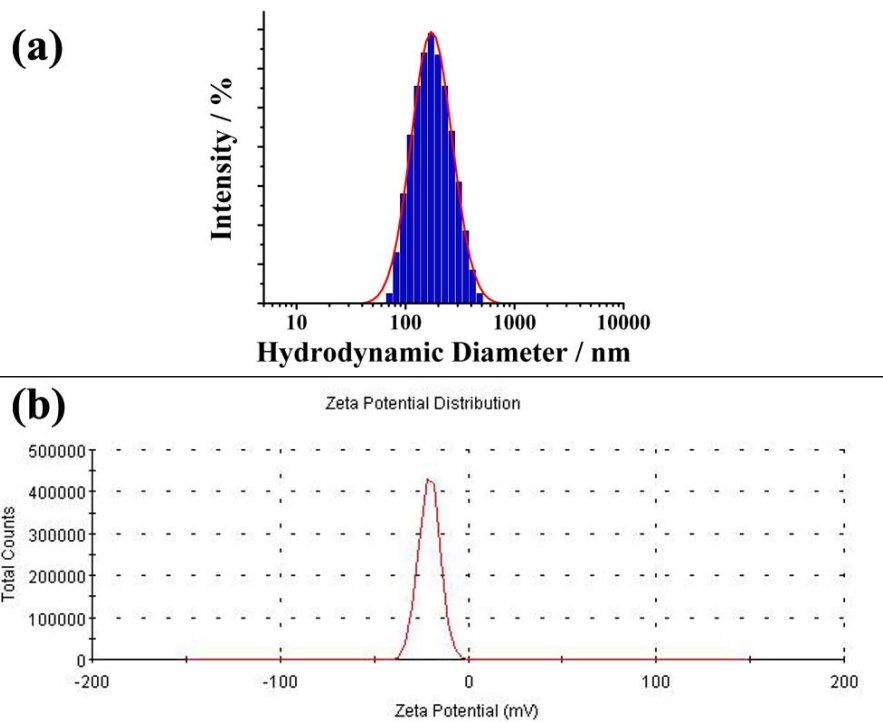

**Fig. S9.** (a) Hydrodynamic diameter and (b) Zeta potential distribution of the nanocarriers after drug loading. No significant changes were observed.

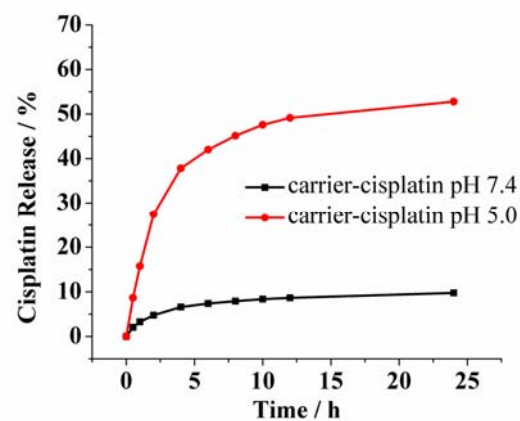

**Fig. S10.** Release profiles of cisplatin-loaded MSN@p(NIPAM-co-MA)-FA in response to pH at room temperature.

**normal nude mouse**

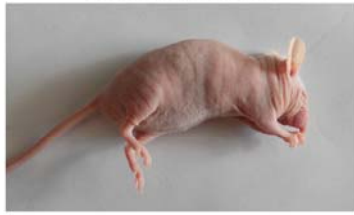

**Hep2 tumor-bearing nude mouse**

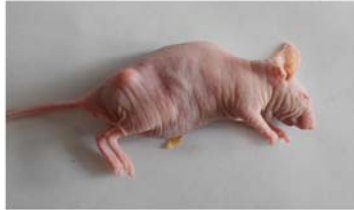

**Fig. S11.** Hep2 tumor-bearing nude mice.
